# Supplementary material for: Development and Chemico-Physical Characterization of Ovine Milk-Based Ingredients for Infant Formulae
Source: MDPI journal article supplement (doi:10.3390/app13010653), 2023-01-03
Supplement: s1 [file s1]

# Development and chemico-physical characterization of ovine milk-based ingredients for infant formulae

G.Lai et al.

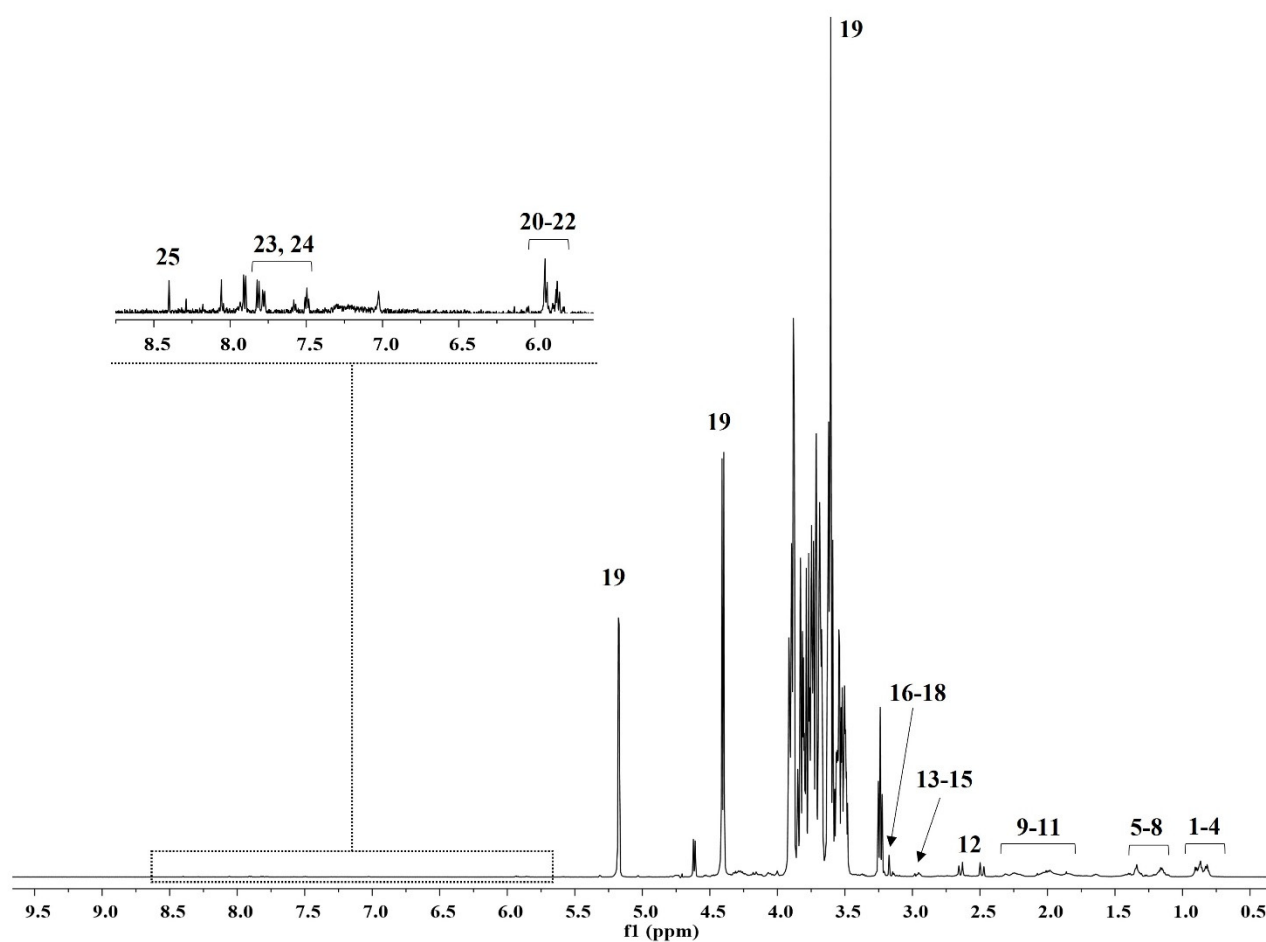

**Figure S1.** Peaks assignment of a representative <sup>1</sup>H NMR spectrum of IF1. Peaks: 1, Leucine; 2, Isoleucine; 3, Valine; 4, Pantothenate; 5, Alanine; 6, Threonine; 7, Caprylate; 8, Fucose; 9, Glutamate; 10, Proline; 11, Acetate; 12, Citrate; 13, Lysine; 14, Creatine; 15, Anserine; 16, Choline; 17, O-Phosphocholine; 18, sn-Glycero-3-phosphocholine; 19, Lactose; 20, UDP-N-Acetylglucosamine; 21, UDP-galactose; 22, UDP-glucose; 23, Hippurate; 24, Uridine; 25, Formate.

**Table S1.** Linear range (LR) of the calibration curves used to quantify the investigated fatty acids.

| <b>Fatty acids</b>                             | <b>LR<br/>(mg g<sub>fat</sub><sup>-1</sup>)</b> |
|------------------------------------------------|-------------------------------------------------|
| C4:0                                           | 20.6 - 411                                      |
| C6:0                                           | 21.8 - 436                                      |
| C8:0                                           | 20.4 - 407                                      |
| C10:0                                          | 20 - 401                                        |
| C12:0                                          | 20.1 - 402                                      |
| C14:0                                          | 20 - 401                                        |
| C16:0                                          | 20 - 401                                        |
| C18:0                                          | 20.1 - 402                                      |
| C18:1 11 <i>trans</i>                          | 28.4 - 402                                      |
| C18:1 9 <i>cis</i>                             | 20.1 - 401                                      |
| C18:2 9 <i>cis</i> 12 <i>cis</i>               | 10.8 - 100                                      |
| C18:3 9 <i>cis</i> 12 <i>cis</i> 15 <i>cis</i> | 10.4 - 209                                      |
| CLA 9 <i>cis</i> 11 <i>trans</i>               | 2.5 - 50                                        |
